# Supplementary material
Source: publisher site journal article supplement (http://www.degruyter.com/publication/journal_key/JBNST/downloadAsset/JBNST_JBNST_CfP_for%20Advancing_agentbased_Economics.pdf)
Supplement: Supplementary file 1 [file JBNST_JBNST_CfP_for%20Advancing_agentbased_Economics.pdf]

# Call for Papers - Special Issue on 'Advancing Agent-based Economics'

Journal of Economics and Statistics (Jahrbücher für Nationalökonomie und Statistik)

## Guest editors

- Michael Neugart, Technical University of Darmstadt ([michael.neugart@tu-darmstadt.de](mailto:michael.neugart@tu-darmstadt.de))
- Frank Westerhoff, University of Bamberg ([frank.westerhoff@uni-bamberg.de](mailto:frank.westerhoff@uni-bamberg.de))

## Topic

Emergent economic phenomena such as the boom-bust nature of financial markets, the diffusion of technologies, business cycles, or firm size distributions may arise via the interaction of heterogeneous agents. Agent-based economic modelling has been proven to be a very helpful tool to study these phenomena in various markets, putting emphasis on the microfoundation of agents' behaviour and the environment in which they interact. Progress has been made to better understand the behaviour of speculative markets that are driven by agents' expectation formation behaviour, technology diffusion in growth models that also address short-term fluctuations of the economy, labour markets where workers have heterogeneous skills, are subject to different institutional environments, and possibly embedded in social networks, and many more domains.

Although this list of achievements could be extended considerably, several issues related to agent-based modelling are only unsatisfactorily explored and need to be advanced. This special issue seeks for contributions that go into that direction. In particular, but not exclusively, we look for manuscripts that devote attention to the following aspects:

- Small-, medium- and large-scale agent-based models that push previous analyses further in any field of economics.
- Agent-based versions of standard economic models exploring their robustness.
- Analyses that explore to which extent agent-based models are scalable.
- Calibration and estimation of agent-based models.
- Linking agent-based models with data, e.g. geocoded data or experimental data.
- Issues of computing, i.e. software to run and replicate models as well as allowing for parallelization.

All papers will be looked after by one guest editor and refereed by two anonymous referees. Papers should be submitted in English to <https://mc.manuscriptcentral.com/jbnst> as Original Article indicating that they are submitted for the Special Issue '*Advancing Agent-based Economics*'.

## Dates

|                               |                                       |
|-------------------------------|---------------------------------------|
| Submission of full papers:    | until December 1 <sup>st</sup> , 2023 |
| First round decisions         | until May 31 <sup>st</sup> , 2024     |
| Submission of revised papers: | until July 31 <sup>st</sup> , 2024    |

Finally accepted papers will be published immediately online ahead of print.
